# Supplementary material
Source: PubMed Central journal article supplement (PMC3131338)
Supplement: 1101315108_pnas.1101315108_SI.pdf [file 1101315108_pnas.1101315108_SI.pdf]

# Supporting Information

Forsyth et al. 10.1073/pnas.1101315108

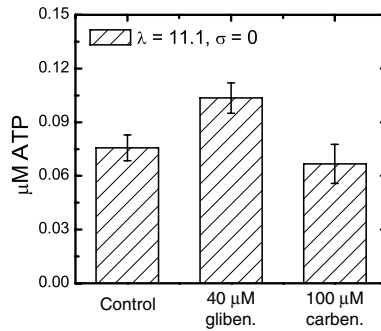

Fig. S1. ATP release control values, in an experiment with zero shear, following drug incubation;  $\lambda = 11.1$ , ATP release ( $\mu\text{M}$ ), converted from  $I_o$  using standard ATP calibration curves, for physiological salt solution controls, 40  $\mu\text{M}$  glibenclamide, and 100  $\mu\text{M}$  carbenoxolone. Error bars =  $\pm 1$  SEM;  $N = 6-8$ .

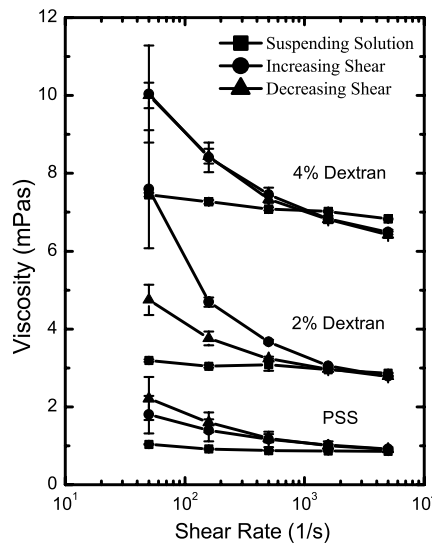

Fig. S2. Flow curve hysteresis as a metric for RBC aggregation. Solution viscosity versus shear rate for physiological salt solution ( $\lambda = 11.1$ ), 2 ( $\lambda = 3.8$ ), and 4% dextran ( $\lambda = 1.6$ ) RBC solutions. Each solution has a flow curve for the control viscosity for the suspending media, increasing shear (50 to 50,000  $\text{s}^{-1}$ ) of the RBC solution, and decreasing shear (5,000–50  $\text{s}^{-1}$ ) of the RBC solution. Hysteresis is the difference between the increasing and decreasing shear curves, and can be described physically by the breakup of rouleaux which contributes to shear thinning. Error bars =  $\pm 1$  SEM;  $N = 3$ .
